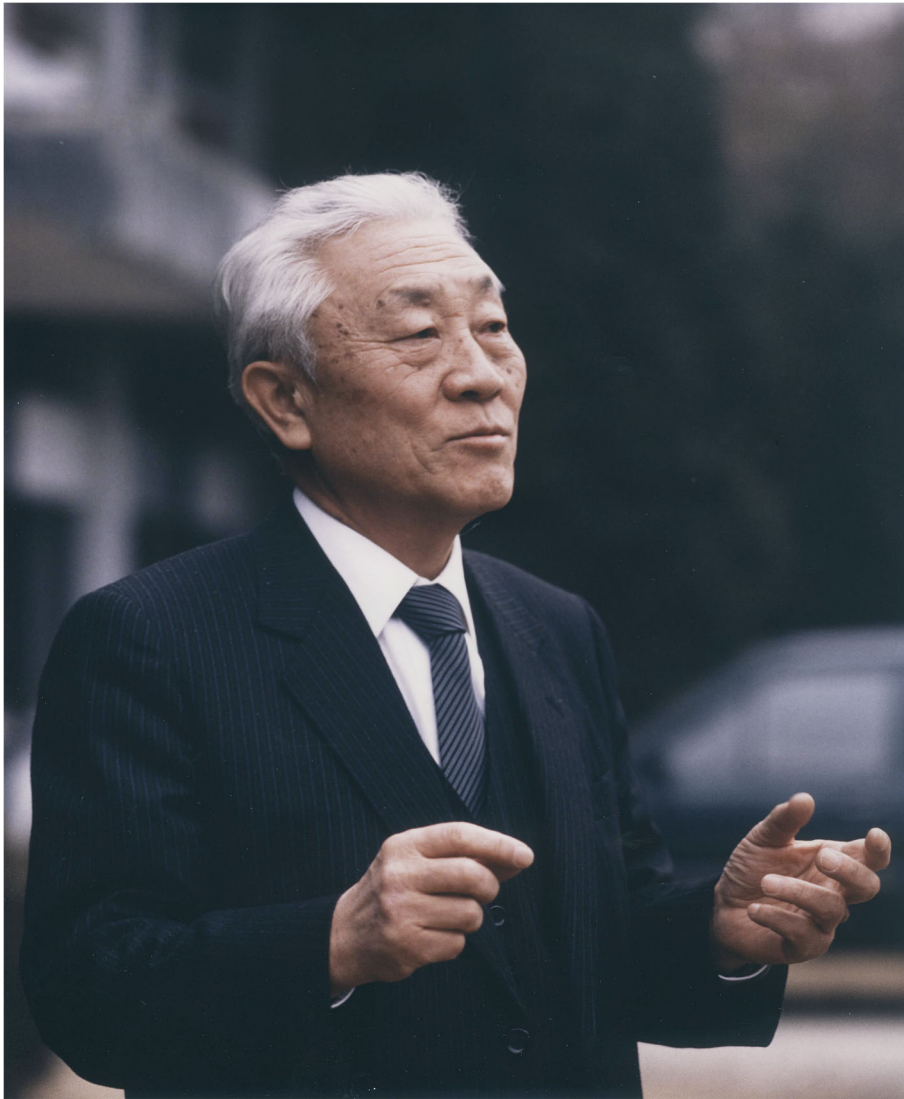

**HOON SOO KIM (17 APRIL 1923–22 APRIL 2015)**

Won Kim \*

School of Biological Sciences, Seoul National University, Seoul 157-747, South Korea

DOI: 10.1163/1937240X-00002375

Prof. Hoon Soo Kim, who died on 22 April 2015, was a pioneer in marine invertebrate taxonomy in Korea and was renowned as the “father of carcinology” in the country. In a very successful career spanning four decades, Prof. Kim’s

influence and impact on Korean biodiversity research was immense.

Prof. Kim was born on 17 April 1923 at Gapsan-gun, Hamgyeongnam-do, which is the most mountainous region

---

\* E-mail: wonkim@plaza.snu.ac.kr

in Korea. He grew up influenced greatly by his grandfather, a doctor of Oriental medicine; and his father, a medical doctor; and became very interested in animals. He entered Kyunggi Middle School in 1937 and graduated in 1942. During summer vacations at that time, he often walked along the coast near a lighthouse in Chongjin, Hamgyeongbuk-do, where his father practiced medicine. He took pleasure in observing crabs, shells, sea urchins, and other invertebrates. This exposure gave him the motivation to begin his life-long study of marine invertebrates, and it was the main reason for his entering the Department of Biology, College of Liberal Arts and Sciences, Seoul National University. He was originally supposed to enter medical school because he had completed a premedical course, but he changed his mind.

Upon graduation in 1949, Prof. Kim became a full-time lecturer at the Department of Biology, Kyungpook National University, from September 1949 to September 1953. He first supervised a student named Chang Eon Lee, who was majoring in insect taxonomy. In the subsequent years, Prof. Lee supervised many other doctorate students in this department and in the process contributed substantially to the development of insect taxonomy in Korea. Prof. Kim moved to the Department of Biology, College of Education, Ewha Womans University in October 1953. There, he supervised Boon Jo Rho, who was majoring in tunicate taxonomy. After graduation, Prof. Rho became an expert on tunicates and later supervised several doctorate students majoring in various groups of marine invertebrate taxonomy in the same department.

From September 1959 to August 1960, Prof. Kim studied at George Peabody College for Teachers, at Nashville, Tennessee, and received the degree of Master of Arts (majoring in Biology). He subsequently attended training courses on marine animal taxonomy held in Bangkok, Thailand, from November to December 1962, sponsored by UNESCO, and interacted with Dr. Raoul Serène, one of the lecturers in the program at that time. Prof. Kim received a Ph.D. with his taxonomic study of Korean anomuran decapods at Seoul National University in February 1965; he had become a professor in the Department of Biology, Sungkyunkwan University from March 1963 to September 1967. His first student was Byung Lae Choe, who majored in molluscan taxonomy, who eventually became full professor himself and a leader in his field. All in all, Prof. Kim contributed to Korean taxonomy not only from his own work, but also through training a whole generation of scholars over the years, who themselves strengthened and grew taxonomic studies of major marine invertebrates.

He subsequently served as a professor at the Department of Zoology, College of Liberal Arts and Sciences, Seoul National University from September 1967. This proved to be his longest tenure, which he relinquished only with his retirement at the age 65 in October 1988.

The history of animal taxonomy in Korea can be divided into two periods, one before 1850, and the other after. There were of course studies of Korean fauna by local scholars before Carolus Linnaeus started his now widely accepted system of classification in 1758, but these did not conform to modern standards. Several groups of European and Korean researchers in the 19th century started studies

of Korean biodiversity afresh after Linnaeus system was adopted. Two Europeans, A. Adams and L. Reeve, first recorded Korean molluscs in 1850, in a paper based on collections at the Jeju Islands between 1843 and 1846. Edward J. Miers subsequently recorded crustacean hermit crabs, crabs, and shrimps in his 1879 publication based on collections made by British fleet sailors. After 1850, there was a general lull in faunal studies, until 1910 to 1945, when Korean animal taxa were studied again, mainly by the Japanese who had occupied Korea. In this period, many studies on mammals, birds, reptiles, amphibians, fishes, molluscs, crabs, shrimps, spiders, insects, flatworms, parasitic nematodes, and protozoa were conducted. In 1941, 122 species of crabs and 26 species of shrimp were recorded by T. Kamita and H. Yoshida, respectively.

The first paper of Prof. Kim was published in 1958, in the first issue of The Korean Journal of Zoology, titled "Four Unrecorded Species of Crabs from the Island Quelpart." After this, he published many more papers on brachyuran decapods from 1958 to 1972. He eventually recorded 168 species, including 46 previously unrecorded. One of these was a new pinnotherid species, *Sakaina koreensis* Kim and Sakai, 1972. As for anomurans, he recorded 45 species (16 were new records) between 1960 and 1972. Based on these results, he wrote the acclaimed "Illustrated Encyclopedia of Fauna & Flora of Korea: Vol. 14, Anomura, Brachyura" published by Ministry of Education, Korea in 1973. Several years later in 1977, he released the "Illustrated Flora & Fauna of Korea: Vol. 19, Macrura," also published by Ministry of Education, Korea.

In 1983, with Dr. John S. Garth, he published an important taxonomic paper titled "Crabs of the family Xanthidae (Crustacea: Brachyura) from the Philippine Islands and adjacent waters based largely on collections of the U.S. Fish Commission steamer Albatross in 1908-1909" in the Journal of Natural History. In this paper, the two authors described 30 genera (three of them new) and 61 species and subspecies (14 of them new). This paper has formed an important basis for many subsequent studies of the crab fauna of the Philippines. While he was working on the decapod taxonomy, he communicated, collaborated, and helped many carcinologists from around the world, including R. B. Manning, L. B. Holthuis, P. A. McLaughlin, A. B. Williams, D. Guinot, F. A. Chace Jr., A. H. and D. M. Banners, J. Haig, T. Sakai, S. Miyake, K. I. Hayashi, K. Baba, M. Takeda, S. L. Yang, and P. K. L. Ng.

Prof. Kim devoted his life to the development of animal taxonomy and the study of the fauna of Korea. For Crustacea, he supervised a number of doctoral students during his tenure in Seoul National University, all of whom have become experts in their fields: Prof. Kyung Sook Lee at Dankook University (amphipods; now retired), Prof. Il Hoi Kim at Gangneung-Wonju National University (originally on barnacles and sea spiders; now working actively on parasitic copepods), Prof. Do Heon Kwon at Inje University (isopods), and Prof. Cheon Young Chang at Daegu University (freshwater copepods, and now also working on gastrotrochs).

With his students over the years, Prof. Kim built the main framework of Korean carcinology and published some

100 papers on these animals. All in all, he discovered 41 new species and subspecies of crustaceans, one new species of chelicerate, and four new species of hexapods (see Appendix I). For these and other academic achievements, he was elected a member of The National Academy of Sciences, Republic of Korea. Prof. Kim served as a president of the Korean Society of Zoology and the Korean Association of Biological Sciences. The influential Korean Society of Systematic Zoology was founded on 8 December 1984 by him and his students, and he was elected its first president. Through this and other activities, he established a strong base for animal taxonomy in Korea.

During his later years, Prof. Kim was also interested in the preservation of nature and served as a president of the Korean Association for Conservation of Nature. In this role, he actively surveyed many areas. Noteworthy was his emphasis on the importance of mud flats and initiated a public campaign on their preservation in Korea. He also served as a Korean committee member of the “Man and Biosphere Program” of UNESCO and helped in designating new biosphere reserves in the country.

Prof. Kim carried out his research on decapod taxonomy using morphology. However, classical taxonomy did not attract a sufficient number of new students, and the Department of Zoology eventually became the Department of Molecular Biology in order to cater to newer methods. While many students adopted molecular biology as a new discipline; Prof. Kim steadfastly continued with his lifetime’s work of morphological taxonomy.

Not surprisingly with such an influential man as my father, as his son, I followed in his footsteps and studied animal taxonomy as well, receiving my Ph.D. with a classical taxonomic study titled “The systematics of the snapping shrimp of *Alpheus* from the eastern Pacific (Decapoda: Alpheidae)” under the supervision of Prof. Lawrence G. Abele at Florida State University in the U.S.A. and then helped him establish a molecular systematic laboratory while a research associate at FSU. I returned to Korea in 1989 from America and took over my father’s position and office at the Department of Zoology, Seoul National University. This unusual situation of “academic succession” was the first such case in the history of Seoul National University.

The scholarly attainments of Prof. Kim are a reflection of his character. He was neither dazzled by superficial brilliance nor swept away by the scientific fashions of the times. He never gave up his original love for the science, and was always a model of seriousness and academic rigor. All his old students cherish the memory of their supervisor, white-haired and struggling with piles of literature and specimens, as “a professor who is not versatile with technology, dull-headed to common customs, takes few personal pleasures, but has a warm and caring heart.” He had been suffering from Alzheimer’s disease for several years and passed away peacefully five days after his 92<sup>nd</sup> birthday, while cared for by his second daughter, Woomi, a medical doctor, and with me, his son, by his side.

## APPENDIX I: TAXA NAMED BY HOON SOO KIM

### Crustaceans

#### Order Decapoda

##### New genera

*Euryxanthops* Garth and Kim, 1983  
*Neolioxantho* Garth and Kim, 1983  
*Philippicarcinus* Garth and Kim, 1983

##### New species

*Uroptychus zezuensis* Kim, 1972  
*Sakaina koreensis* Kim and Sakai, 1972  
*Actumnus marissinicus* Takeda and Kim, 1977  
*Globopilumnus multituberosus* Garth and Kim, 1983 [presently *Eupilumnus laciniatus* (Sakai, 1980)]  
*Actaeodes quinquelobatus* Garth and Kim, 1983  
*Actumnus granotuberosus* Garth and Kim, 1983  
*Euryxanthops dorsiconvexus* Garth and Kim, 1983  
*Euryxanthops flexidentatus* Garth and Kim, 1983  
*Glabropilumnus spinidentatus* Garth and Kim, 1983 (presently in *Lentilumnus*)  
*Neoactumnus unispina* Garth and Kim, 1983  
*Neolioxantho asterodactylus* Garth and Kim, 1983  
*Parapanope hexacarapas* Garth and Kim, 1983  
*Parapilumnus euryfrons* Garth and Kim, 1983 (presently *Pilumnus neglectus* Bals, 1933)  
*Parapilumnus nefissurus* Garth and Kim, 1983 (presently in *Aniptumnus*)  
*Parapilumnus tuberculatus* Garth and Kim, 1983 (presently in *Latopilumnus*)  
*Philippicarcinus oviformis* Garth and Kim, 1983  
*Philippicarcinus tuberomerus* Garth and Kim, 1983

##### New subspecies

*Caridina denticulata keunbaei* Kim, 1976 [presently *Neocaridina keunbaei* (Kim, 1976)]

#### Order Amphipoda

*Gammarus galgosensis* Lee and Kim, 1980  
*Gammarus odaensis* Lee and Kim, 1980  
*Gammarus soyoensis* Lee and Kim, 1980  
*Gammarus zeongogensis* Lee and Kim, 1980  
*Ampithoe brevivalma* Kim and Kim, 1988  
*Ampithoe koreana* Kim and Kim, 1988  
*Ampithoe youngsanensis* Kim and Kim, 1988  
*Peramphithoe baegryeongensis* Kim and Kim, 1988  
*Peramphithoe namhaensis* Kim and Kim, 1988

#### Order Isopoda

*Gnorimosphaeroma hoestlandti* Kim and Kwon, 1985  
*Dynoides spinipodus* Kwon and Kim, 1986  
*Gnorimosphaeroma naktongense* Kwon and Kim, 1987  
*Gnorimosphaeroma chejuensi* Kim and Kwon, 1988  
*Cleantioides emarginata* Kwon and Kim, 1992  
*Cleantioides poorei* Kwon and Kim, 1992

#### Order Cyclopoida

*Acanthocyclops tokchokensis* Kim and Chang, 1991

#### Order Harpacticoida

*Harpacticella itoi* Chang and Kim, 1991  
*Attheyella paucisetosa* Chang and Kim, 1992  
*Attheyella byblis* Chang and Kim, 1992

#### Order Sessilia [Thecostraca]

*Membranobalanus koreanus* Kim and Kim, 1983  
*Acasta chejudoensis* Kim and Kim, 1988

*Acasta paraspinifera* Kim and Kim, 1988

## Order Lepadiformes

*Paralepas phyllacanthusi* Kim and Kim, 1988

## Pycnogonida

## Order Pantopoda

*Achelia crurispinifera* Kim and Kim, 1985

## Insecta

## Order Diptera

*Glyptotendipes goryoensis* Ree and Kim, 1981 (presently *Lipiniella moderata* Kalugina, 1970)

*Microcricotopus seoulensis* Ree and Kim, 1981

*Polypedilum edensis* Ree and Kim, 1981

*Polypedilum youngsanensis* Ree and Kim, 1981

## APPENDIX II: PUBLICATIONS OF HOON SOO KIM IN CHRONOLOGICAL ORDER

- Kim, H. S. 1958. Four unrecorded species of crabs from the Island Quelpart. *Korean Journal of Zoology* 1: 7-8 (in Korean, with English summary).
- . 1958. The crabs in the vicinity of Daichun sea-bathing place. *Journal of Biological Sciences* 3: 11-13 (in Korean, with English summary).
- . 1960. Crabs and hermit crabs from Ulreung I. and Dogdo I. *Journal of Korean Culture Research Institute, Ewha Womans University* 1: 341-344 (in Korean).
- . 1962. Fauna of the crabs on the coasts of the western islands of Korea. *Korean Journal of Zoology* 5: 51-55 (in Korean, with English summary).
- Kang, Y. S., H. S. Kim, H. S. Kang, and I. S. Hong. 1962. On the unrecorded species of *Paramecium* in Korea. *Korean Journal of Zoology* 5: 56-60 (in Korean, with English summary).
- Kim, H. S. 1963. On the distribution of anomuran decapods of Korea. *Sung Kyun Kwan University Journal* 8: 287-311 (in Korean, with English summary).
- . 1964. A study on the geographical distribution of anomuran decapods of Korea with consideration of its oceanographic conditions. *Sung Kyun Kwan University Journal* 8(Suppl.): 1-15, pl. 1 (in Korean, with English summary).
- , and J. S. Song. 1965. Morphological study of Microfilariae found in the area of Yongju-Gun. *Korean Journal of Zoology* 8: 11-14 (in Korean, with English summary).
- Rho, B. J., and H. S. Kim. 1966. Studies on the Echinodermata (Echinoidea, Asteroidea and Ophiuroidea) from Korea, pp. 273-313 (including pls. 1-9). In, *Commemoration Papers for Dr. Emma Kim's Forty Years Teaching at Ewha Womans University, Seoul*.
- Kim, H. S. 1966. Unrecorded species of brachyuran decapods from Korea. *Sung Kyun Kwan University* 11: 399-412 (including pls. 1-3) (in Korean, with English summary).
- , and B. L. Choe. 1968. Addition of three anomuran species to the fauna of Korea. *Reports from the Institute of Marine Biology, Seoul National Univ.* 2: 1-9 (including pl. 1).
- , B. J. Rho, and C. J. Sim. 1968. Marine sponges in South Korea (1). *Korean Journal of Zoology* 11: 37-47 (including pls. 1-3).
- , and B. L. Choe. 1969. New records of three brachyuran species (Crustacea, Decapoda) from Korea. *Korean Journal of Zoology* 12: 9-12.
- Rho, B. J., H. S. Kim, and C. J. Sim. 1969. Marine sponges in South Korea (2). *The Journal of Korean Research Institute for Better Living, Ewha Womans University* 3: 153-160, pls. 1-2.
- Kim, H. S., and K. B. Park. 1969. Studies on the pollution and zooplankton of the Han River as the source of the water supply for producing good quality water. R. 69-34, Ministry of Science and Technology: 25-44 (including pls. 1-7) (in Korean, with English abstract).
- , and ———. 1969. A study on the copepods and branchiopods from Han River, Korea, I. Kwangnaru and Bokwang Dong regions. *Seoul National University, Department of Zoology Journal, Zoologica* 8: 1-17 (including pls. 1-5) (in Korean, with English summary).
- . 1970. A checklist of the Anomura and Brachyura (Crustacea, Decapoda) of Korea. *Seoul National University Journal, Biology and Agriculture Series (B)* 21: 1-34 (including pls. 1-5).
- Choe, B. L., and H. S. Kim. 1971. New records of three anomuran species (Crustacea, Decapoda) from Korea. *Korean Journal of Zoology* 14: 27-32.
- Kim, H. S., and B. J. Rho. 1971. On the distribution of the benthic animals of Korean coastal Seas, 1. Jeju Island region. Report for the IBP, Korean National Committee for the IBP 5: 7-27.
- , and ———. 1972. The seashore marine fauna of Chuja Islands, pp. 67-108. In, *A report of the floral and faunal survey of Chuja Island, Bureau of Cultural Property, Ministry of Culture and Information, Republic of Korea* (in Korean).
- . 1972. A new species of family Chirostylidae (Crustacea: Anomura) from Jeju Island, Korea. *Korean Journal of Zoology* 15: 53-56.
- , and K. B. Park. 1972. New records of the brachiuran species (Crustacea: Decapoda) from Korea. *Korean Journal of Zoology* 15: 57-69 (including pl. 1).
- , and ———. 1972. Faunal studies on the macrurans in Korea. R-72-82, Ministry of Science and Technology: 185-222 (including pls. 1-6) (in Korean, with English summary).
- . 1972. On the geographical distribution of the crabs in Korea with considerations of currents, pp. 519-524. In, *The Kuroshio II, Proceedings of the Second CSK Symposium, Tokyo, 1970*. Saikon, Tokyo.
- , and T. Sakai. 1972. A new pinnotherid crab of the genus *Sakaina* (decapod crustaceans) from Korea. *Proceedings of the Japanese Society of Systematic Zoology* 8: 29-31.
- , and K. B. Park. 1973. Faunal studies on the fresh-water macrurans in Korea. R-73-83, Ministry of Science and Technology: 115-136, pl. 1 (in Korean, with English summary).
- . 1973. Report on a collection of animals from Baegryeong I. and Daecheong I. *College Review, College of Liberal Arts and Sciences, Seoul National University* 19: 427-436 (in Korean).
- , and K. S. Lee. 1975. Faunal studies on the genus *Caprella* (Crustacea: Amphipoda, Caprellidae) in Korea. *Korean Journal of Zoology* 18: 115-126.
- , and B. L. Choe. 1976. A report on four unrecorded anomuran species (Crustacea: Decapoda) from Korea. *Korean Journal of Zoology* 19: 43-49.
- . 1976. A checklist of Macrura (Crustacea, Decapoda) of Korea. *Proceedings of the College of Natural Sciences, Seoul National University* 1: 131-152.
- . 1976. A new subspecies of *Caridina denticulata* (Crustacea, Decapoda, Atyidae) from Jeju Island, Korea. *Korean Journal of Zoology* 19: 155-160.
- , and K. S. Lee. 1977. A systematic study on the amphipods in Korea, II. On the geographical distribution and variation of species of fresh-water *Gammarus* (Crustacea: Amphipoda, Gammaridae). *Korean Journal of Zoology* 20: 29-40 (in Korean, with English summary).
- . 1977. A fauna-list of the decapod crustaceans of Korea, pp. 199-208. In, *Commemoration Papers for Professor M. J. Lee* (in Korean).
- Takeda, M., and H. S. Kim. 1977. A new *Actummus* (Crustacea: Decapoda, Brachyura) from Jeju Island, Korea. *Korean Journal of Zoology* 20: 135-139.
- Kim, H. S., and K. S. Lee. 1978. Systematic study of Amphipoda (Crustacea) in Korea. III. Four unrecorded caprellids (Caprellidae) from South Korea. *Korean Journal of Zoology* 21: 1-7.
- , and ———. 1978. Report on a collection of marine animals from Dong-gyeongryeolbi I., Seogdo I. and Gungsi I. *The Report on the KACN* 12: 97-101 (in Korean, with English summary).
- . 1978. Report on the collection of coastal marine invertebrates of Dokdo. *The Conservation of Nature and Natural Resources, Korea* 23: 13-15 (in Korean, with English summary).
- , B. J. Rho, S. Y. Hong, I. H. Kim, S. Shin, and C. H. Han. 1979. The marine invertebrate fauna in the southern part of Goeje Island and its adjacent five islands. *The Report of KACN* 14: 103-126 (in Korean, with English summary).
- Kim, I. H., and H. S. Kim. 1980. Systematic studies on the cirripedes (Crustacea) from Korea. I. Balanomorph barnacles (Cirripedia, Thoracica, Balanomorph). *Korean Journal of Zoology* 23: 161-194.
- Lee, K. S., and H. S. Kim. 1980. On the geographical distribution and variation of freshwater *Gammarus* in Korea, including descriptions of four new species. *Crustaceana* 6(Suppl.): 44-67.

- Kim, H. S., K. S. Lee, W. Kim, and D. H. Kwon. 1981. A faunal and ecological study on the crustaceans in the intertidal zones near Incheon and southern part of Ganghwa Island. *Bulletin of the Korean Association for Conservation of Nature, Series III*: 279-309 (in Korean, with English summary).
- Ree, H. I., and H. S. Kim. 1981. Studies on Chironomidae (Diptera) in Korea I. Taxonomical study on adults of Chironomidae. *Proceedings of the College of Natural Sciences* 6: 123-226.
- Kim, H. S. 1981. Systematic study of Crustacea in Korea. *Annual Report of Biological Research, Institute of Biological Research, Jeonbuk National University, Korea* 2: 123-125 (in Korean).
- , and B. L. Choe. 1981. The fauna of marine invertebrate in Ulreung Is. and Dogdo Is., pp. 93-200. In, *The Report of the KACN, No. 19. A Report on the Scientific Survey of the Ulreung and Dogdo Islands (1981)*.
- Kim, W., and H. S. Kim. 1982. Classification and geographical distribution of Korean crabs (Crustacea, Decapoda, Brachyura). *Proceedings of the College of Natural Sciences, Seoul National University* 7: 133-159.
- Kim, H. S., and D. H. Kwon. 1982. Marine invertebrate fauna in the vicinity of Wando Island, pp. 187-206. In, *Report on the Survey of Natural Environment in Korea, No. 2. The Islands adjacent to Wando (in Korean, with English summary)*.
- Kim, J. H., H. S. Kim, I. K. Lee, J. W. Kim, H. T. Mun, K. H. Suh, W. Kim, D. H. Kwon, S. A. Yoo, Y. B. Suh, and Y. S. Kim. 1982. Studies on the estuarine ecosystem of the Nagdong River. *Proceedings of the College of Natural Sciences, Seoul National University* 7: 121-163 (in Korean, with English summary).
- Kim, H. S., and B. L. Choe. 1982. An annual change of species composition and abundance of crustacean decapod community in an eastern channel of Ganghwa Island. *Bulletin of the Korean Association for Conservation of Nature, Series IV*: 313-323 (in Korean, with English summary).
- , and I. H. Kim. 1983. A new species of *Membranobalanus* (Crustacea, Cirripedia) from the Korean waters. *Korean Journal of Zoology* 26(1): 41-47.
- , I. K. Lee, C. H. Koh, I. H. Kim, Y. B. Suh, and N. Sung. 1983. Studies on the marine benthic communities in inter- and subtidal zones, I. Analysis of benthic community structures at Aninjin, eastern coast of Korea. *Proceedings of the College of Natural Sciences, Seoul National University* 8: 71-108 (in Korean, with English summary).
- Garth, J. S., and H. S. Kim. 1983. Crabs of the family Xanthidae (Crustacea: Brachyura) from the Philippine Islands and adjacent waters based largely on collections of the U.S. Fish Commission steamer Albatross in 1908-1909. *Journal of Natural History* 17: 663-729.
- Kim, H. S., Y. H. Chung, S. W. Hong, M.-S. Kang, I. K. Lee, and W. H. Chung. 1983. Studies on the establishment of Korean names for the organisms of foreign origin. *Biology Education* 11: 3-32 (in Korean, with English summary).
- , and D. H. Kwon. 1984. Marine invertebrate fauna in the vicinity of Jindo Island, pp. 313-336. In, *Report on the Survey of Natural Environment in Korea, No. 3. Jodo Area, Dadohae Marine National Park (in Korean, with English summary)*.
- , and ———. 1984. The fauna and distribution of mollusks in the lower reaches of the Nakdong River where migratory birds come flying. *Nature Conservation* 46: 39-45 (in Korean, with English summary).
- Lee, I. K., H. S. Kim, C. H. Koh, J. W. Kang, S. Y. Hong, S. M. Boo, I. H. Kim, and Y. C. Kang. 1984. Studies on the marine benthic communities in inter- and subtidal zones, II. Qualitative and quantitative analysis of the community structure in south-eastern coast of Korea. *Proceedings of the College of Natural Sciences, Seoul National University* 9: 71-126 (in Korean, with English summary).
- Kim, H. S., and C. Y. Chang. 1984. Freshwater animals in Mt. Sorak, II. Invertebrates, pp. 412-427. In, *Report of the academic survey of Mt. Sul Ak (in Korean, with English summary)*.
- , and I. H. Kim. 1985. *Achelia crurispinifera*, a new pycnogonid species from Korean waters. *Korean Journal of Zoology* 28: 122-126.
- . 1985. Systematic studies on crustaceans of Korea, I. Decapods. *Proceedings of the College of Natural Sciences, Seoul National University* 10: 63-94 (in Korean, with English summary).
- , and S. M. Yoon. 1985. The marine mollusks and arthropods in Hujin, Kangwondo. *Nature Conservation* 50: 35-42 (in Korean, with English summary).
- , and C. Y. Chang. 1985. The brachyuran crabs of Cheju Island, Korea (Crustacea: Decapoda). *Korean Journal of Systematic Zoology* 1: 41-60.
- Lee, I. K., H. S. Kim, B. L. Choe, and H. B. Lee. 1985. Studies on the marine benthic communities in inter- and subtidal zones, III. Qualitative and quantitative analysis of the community structure in western coast of Korea. *Proceedings of the College of Natural Sciences, Seoul National University* 10: 57-100 (in Korean, with English summary).
- Kim, H. S., and D. H. Kwon. 1985. The systematic study of the family Sphaeromatidae (Crustacea, Isopoda, Flabellifera) from Korea. *Inje Journal* 1: 143-165.
- , and I. H. Kim. 1985. Marine invertebrate fauna of Komundo I., Taesambudo I. and Sangpaekdo I., pp. 181-206. In, *Report on the Survey of Natural Environment in Korea, No. 4. The Islands Adjacent to Komundo and Paekdo (in Korean, with English summary)*.
- Kwon, D. H., and H. S. Kim. 1986. *Dynoides spinipodus*, a new species of sphaeromatid isopod (Crustacea) from the south coasts of Korea. *Korean Journal of Systematic Zoology* 2: 43-48.
- Chang, C. Y., and H. S. Kim. 1986. The freshwater Calanoida (Crustacea: Copepoda) of Korea. *Korean Journal of Systematic Zoology* 2: 49-60.
- Kim, H. S., and M. K. Shin. 1986. Marine mollusks and arthropods from Dolsan Island in South Sea of Korea. *Nature Conservation* 55: 31-40 (in Korean, with English summary).
- Ra, K. H., and H. S. Kim. 1986. An analytical study of the exhibits of biology in National Science Exhibitions. *Biology Education* 14: 25-44 (in Korean, with English summary).
- Kim, H. S. 1986. On the geographical distribution of anomuran and brachyuran crabs in Korean waters. *Korean Journal of Systematic Zoology* 2: 67-78.
- , and I. H. Kim. 1986. Marine invertebrate fauna of Ch'ujado Islands, pp. 309-332. In, *Report on the Survey of Natural Environment in Korea, No. 5. The Ch'uja Archipelago (in Korean, with English summary)*.
- , and ———. 1987. Marine gammaridean Amphipoda (Crustacea) of Cheju Island and its adjacent waters, Korea. *Korean Journal of Systematic Zoology* 3: 1-23.
- Kwon, D. H., and H. S. Kim. 1987. A new species of the genus *Gnori-mosphaeroma* (Crustacea, Isopoda, Sphaeromatidae) from the Kaktong River, with a key to the Korean species of the genus. *Korean Journal of Systematic Zoology* 3: 51-56.
- Kim, H. S., S. M. Yoon, and M. K. Shin. 1987. The aquatic invertebrates inhabiting benthic environments of the Han River in Seoul, pp. 213-264. In, *Report on inventories for the Han River ecosystem, Seoul City (in Korean, with English summary)*.
- Yoon, S. M., and H. S. Kim. 1987. A systematic study on the freshwater Cladocera from Korea. *Korean Journal of Systematic Zoology* 3: 175-207 (in Korean, with English summary).
- Kim, H. S., and C. B. Kim. 1987. The anomuran crabs (including thalassinideans) of Cheju Island and its adjacent waters, Korea (Crustacea: Decapoda). *Korean Journal of Systematic Zoology* 3: 225-236.
- , and M. O. Song. 1987. Marine mollusks and arthropods in Sonyu Island and Munyo Island, Yellow Sea of Korea. *Nature Conservation* 58: 37-48 (in Korean, with English summary).
- , and D. H. Kwon. 1987. Marine invertebrate fauna of Huksan Islands, pp. 287-314. In, *Report on the Survey of Natural Environment in Korea, No. 6. Huksan Archipelago (in Korean, with English summary)*.
- , and C. Y. Chang. 1987. The fauna and distribution of mollusks and crustaceans in the estuary of the Nakdong River. *Bulletin of the Korean Association for Conservation of Nature, Series 9*: 31-58 (in Korean, with English summary).
- , and S. N. Moon. 1988. Terrestrial Heterotardigrada (Tardigrada) from Korea. *Korean Journal of Systematic Zoology* 4: 47-56.
- Shin, M. K., and H. S. Kim. 1988. Several hypotrichous ciliates inhabiting the Han River in Seoul. *Korean Journal of Systematic Zoology, Special Issue* 2: 67-85.
- Moon, S. N., and H. S. Kim. 1988. Eutardigrada (Tardigrada) from Korea. *Korean Journal of Systematic Zoology, Special Issue* 2: 87-96.
- Kim, H. S., and C. B. Kim. 1988. Marine gammaridean Amphipoda (Crustacea) of the family Ampitoidae from Korea. *Korean Journal of Systematic Zoology, Special Issue* 2: 107-134.
- Choe, B. L., and H. S. Kim. 1988. On the classification and distribution of archeogastropods from Korean waters. *Korean Journal of Systematic Zoology, Special Issue* 2: 135-198.
- Kim, H. S., and D. H. Kwon. 1988. Bopyrid isopods parasitic on decapod crustaceans in Korea. *Korean Journal of Systematic Zoology, Special Issue* 2: 199-221.

- , and ———. 1988. Marine isopod crustaceans from Cheju Island, Korea. *Inje Journal* 4: 195-220.
- Kim, I. H., and H. S. Kim. 1988. Three new species of Cirripedia (Crustacea) from Korea. *Korean Journal of Systematic Zoology, Special Issue 2*: 223-232.
- Kim, H. S., H. S. Kwak, and D. H. Kwon. 1988. The summer growth and the ratios of the breadth to the length of the carapace of the crab, *Macrophthalmus (Mareotis) japonicus* De Haan. *Korean Journal of Systematic Zoology, Special Issue 2*: 233-241 (in Korean, with English summary).
- Park, H. C., C. E. Lee, and H. S. Kim. 1988. Wing morphometric analysis of *Psylla elaeagni* complex (Homoptera: Psyllidae). *Korean Journal of Systematic Zoology, Special Issue 2*: 243-250 (in Korean, with English summary).
- Kim, H. S., and C. B. Kim. 1988. The shrimps (Penaeoidea, Stenopodidea, Caridea and Astacidea) and lobsters (Palinura) of Cheju Island, Korea (Crustacea: Decapoda). *Korean Journal of Systematic Zoology* 4: 165-172.
- , and G. S. Min. 1988. Marine mollusks and arthropods in Ch'ollip'o, Mallip'o and Mohang in Yellow Sea of Korea. *Nature Conservation* 64: 25-35 (in Korean, with English summary).
- , and B. L. Choe. 1988. Marine benthic fauna of Paengnyong-do I., Taccheong-do I. and Socheong-do I., pp. 355-396. In, Report on the Survey of Natural Environment in Korea, No. 7 (in Korean, with English summary).
- Song, M. O., and H. S. Kim. 1989. Monogonodont rotifers (Monogononta: Rotifera) inhabiting several lowland swamps in Kyongsangnam-do, Korea. *Korean Journal of Systematic Zoology* 5: 139-157.
- Kim, H. S., and C. Y. Chang. 1989. Freshwater cyclopoid copepods (Cyclopoida, Cyclopidae) of Korea. *Korean Journal of Systematic Zoology* 5: 225-256.
- , and ———. 1989. Freshwater invertebrates in Mt. Wolch'ul, pp. 159-174. In, The Report of the KACN, No. 24 (in Korean, with English abstract).
- , and ———. 1990. Marine benthic invertebrates from the coast of Chungchoungnam-do, Korea. *Nature Conservation* 72: 29-48 (in Korean, with English summary).
- Chang, C. Y., and H. S. Kim. 1991. *Harpacticella itoi*, a new harpacticoid species from Korea (Copepoda: Harpacticoida: Harpacticidae). *Korean Journal of Systematic Zoology* 7: 73-80.
- Kim, H. S., and C. Y. Chang. 1991. *Acanthocyclops tokchokensis*, a new cyclopoid copepod species from wells in Tokchok Island of Korea (Copepoda, Cyclopoida, Cyclopidae). *Korean Journal of Systematic Zoology* 34: 300-306.
- , H. B. Kong, and G. J. Bae. 1991. Brachiopods and crustaceans in intertidal zones of the west coast of Korea (the southern end of Kanghwa Island), pp. 81-101. In, Regional Survey of Natural Ecosystem in 1991: Survey of Intertidal Zones of the West Coast of Korea (the Southern End of Kanghwa Island). Ministry of Environment (in Korean).
- , D. K. Lee, M. K. Shin, and H. B. Kong. 1992. Marine invertebrate fauna in the area adjacent to the demilitarized zone (Paengnyong Islet and Yonp'yeng Islet), pp. 651-697. In, The Survey Report on the Natural Ecosystems in the Area Adjacent to the Demilitarized Zone (Civilian Restricted Area), Ministry of Environment (in Korean).
- Kwon, D. H., and H. S. Kim. 1992. Two new species of the genus *Cleantioides* (Isopoda: Valvifera: Holognathidae) from Korea. *Korean Journal of Systematic Zoology, Special Issue 3*: 85-92.
- Chang, C. Y., and H. S. Kim. 1992. Two new species of genus *Attheyella* (Harpacticoida, Canthocamptidae) from springs of Korea. *Korean Journal of Systematic Zoology, Special Issue 3*: 67-76.

AVAILABLE ONLINE: 8 September 2015.
